# Supplementary material for: Core–shell structured microcapsular-like Ru@SiO2 reactor for efficient generation of COx-free hydrogen through ammonia decomposition
Source: Royal Society of Chemistry journal article supplement (doi:10.1039/c0cc00430h), 2010-01-01
Supplement: c0cc00430h.pdf [file c0cc00430h.pdf]

## Supplementary information

### 1. N<sub>2</sub> adsorption-desorption data

Table 1 The characteristics of the Dried-SMP-R@SiO<sub>2</sub> and Calcined-SMP-R@SiO<sub>2</sub> catalysts after reduction

| Catalyst                        | Specific surface area (m <sup>2</sup> /g) | Pore volume (cm <sup>3</sup> /g) | Pore size distribution (nm) |
|---------------------------------|-------------------------------------------|----------------------------------|-----------------------------|
| Dried-SMP-R@SiO <sub>2</sub>    | 11.4                                      | 0.017                            | < 2.0 (micro); 20.7 (meso)  |
| Calcined-SMP-R@SiO <sub>2</sub> | 15.6                                      | 0.022                            | < 2.0 (micro); 17.2 (meso)  |

### 2. H<sub>2</sub>-TPD and H<sub>2</sub>-TPR characterizations

H<sub>2</sub>-TPD experiments were carried out to estimate the surface metal exposure of the two catalysts. Before each measurement, the sample (0.3 g) was heated to 823 K in a flow of 25% H<sub>2</sub>/Ar at a rate of 10 K/min, and kept at this temperature for 2 h. After being cooled down to room temperature (RT) and kept at RT for 0.5 h, the sample was purged with He at 323 K for 0.5 h. Then the catalyst was heated at a rate of 10 K/min while the H<sub>2</sub>-TPD curve was recorded.

Temperature-programmed reduction (TPR) was conducted according to the following steps. Prior to each measurement, the sample (50 mg) was heated from room temperature (RT) to 623K at a rate of 10 K/min under Ar flow (40 ml/min), and kept at this temperature for 30 min for the removal of adsorbed specimen (e.g. H<sub>2</sub>O). After the sample was cooled to RT, the gas flow was switched to 5% H<sub>2</sub>/Ar (40 ml/min). Finally, TPR profiles were obtained with a temperature ramp of 10 K/min using a thermal conductivity detector.

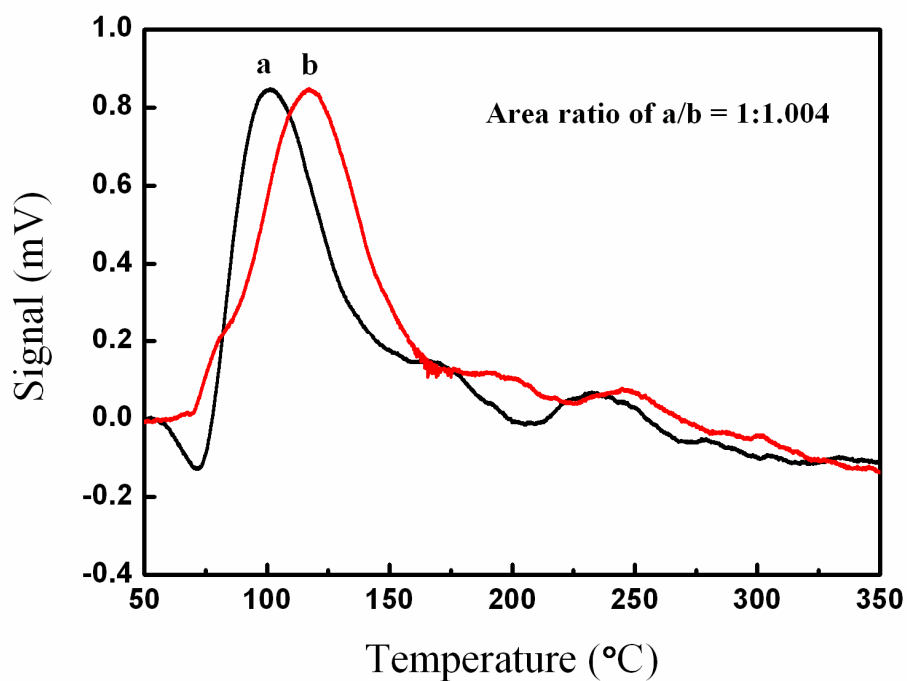

Fig. 1. H<sub>2</sub>-TPD profile of (a) Dried-SMP-R@SiO<sub>2</sub> and (b) Calcined-SMP-R@SiO<sub>2</sub> catalysts. The area ratio of a/b is 1:1.004 in the temperature range of 50-350°C.

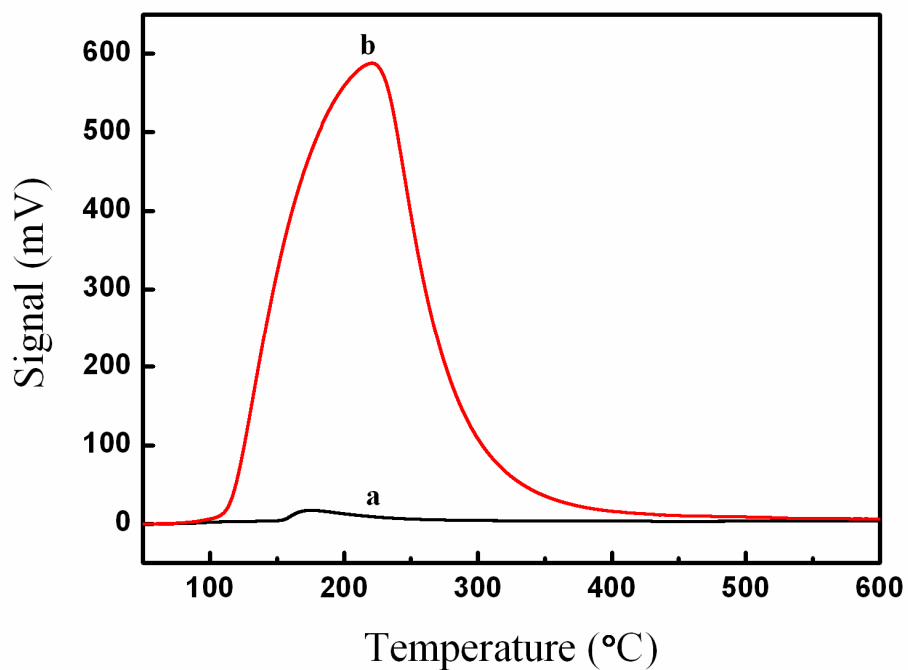

Fig. 2. H<sub>2</sub>-TPR profile of (a) Dried-SMP@SiO<sub>2</sub> and (b) Calcined-SMP@SiO<sub>2</sub>.
